# Supplementary material for: Electrospun Ce–Ni–O composite nanofibers for highly selective propane detection at high temperature based on its rapid reaction kinetics
Source: Royal Society of Chemistry journal article supplement (doi:10.1039/c4ta01356e), 2014-06-19
Supplement: c4ta01356e1.pdf [file c4ta01356e1.pdf]

**Electronic Supporting Information to:**

**Electrospun Ce-Ni-O Composite Nanofibers for Highly  
Selective Propane Detection at High Temperature Based on Its  
Rapid Reaction Kinetics**

*Yixin Liu, Xiangcheng Sun, Zhou Zhiquan and Yu Lei\**

Department of Chemical and Biomolecular Engineering, University of Connecticut,  
Storrs, CT 06269, U.S.A.

\*Corresponding author. Tel: +1 (860) 486-4554. Fax: +1 (860) 486-2959

E-mail: [ylei@engr.uconn.edu](mailto:ylei@engr.uconn.edu)

## SUPPLEMENTARY RESULTS

### Sensing performance of CeO<sub>2</sub> NFs and NiO NFs-based sensor as control experiments

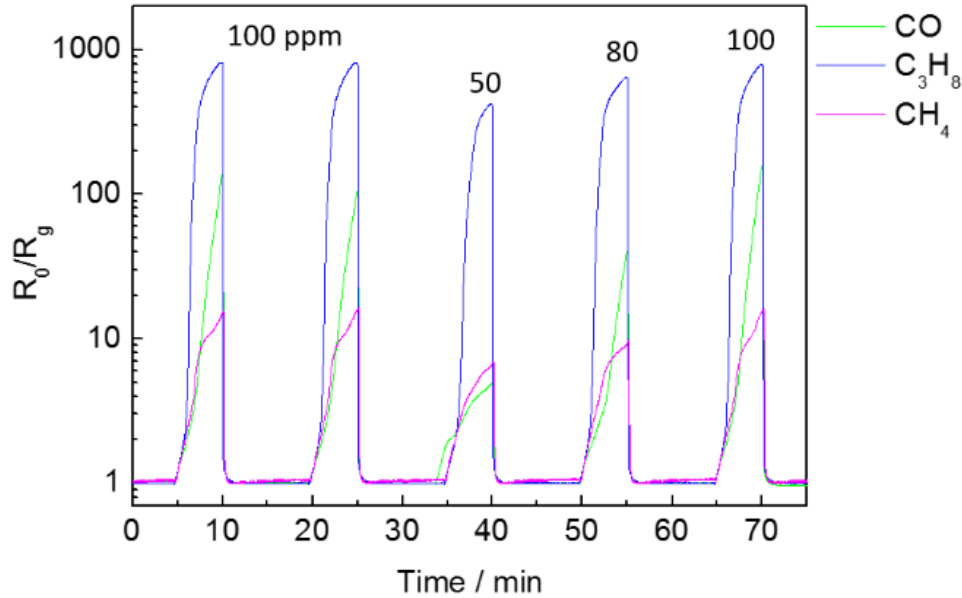

Figure S1. The semi-log plot of real-time sensor responses of CeO<sub>2</sub> NFs based sensors upon periodic exposure to different concentrations of CO, CH<sub>4</sub> and C<sub>3</sub>H<sub>8</sub> balanced by N<sub>2</sub> at 800 °C with an applied DC bias of 1 V (recovering gas is 1% O<sub>2</sub>/N<sub>2</sub>).

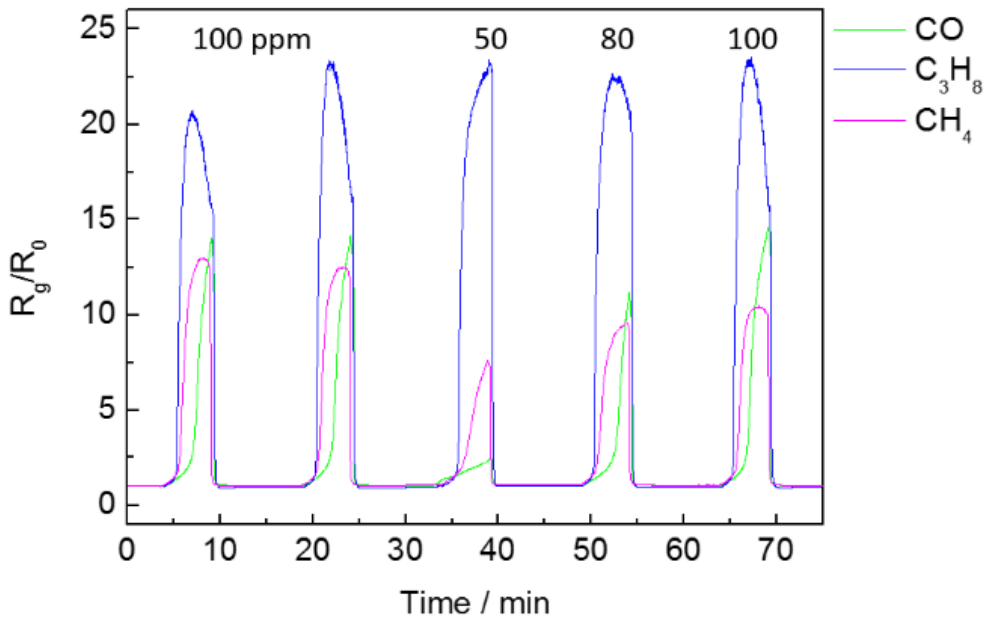

Figure S2. The semi-log plot of real-time sensor responses of NiO NFs based sensors upon periodic exposure to different concentrations of CO, CH<sub>4</sub> and C<sub>3</sub>H<sub>8</sub> balanced by N<sub>2</sub> at 800 °C with an applied DC bias of 1 V (recovering gas is 1% O<sub>2</sub>/N<sub>2</sub>).
